# Supplementary material for: The role of transformational leadership in enhancing school culture and teaching performance in Yemeni public schools
Source: Frontiers journal article supplement (doi:10.3389/feduc.2024.1413607), 2024-07-08
Supplement: Data_Sheet_1.pdf [file Data_Sheet_1.pdf]

## Section One: *Transformational Leadership*

Strongly disagree = 1 | Disagree = 2 | Neutral = 3 | Agree = 4 | Strongly agree = 5

### Idealized Influence

| Statement |                                                                              | Scale |   |   |   |   |
|-----------|------------------------------------------------------------------------------|-------|---|---|---|---|
|           |                                                                              | 1     | 2 | 3 | 4 | 5 |
| 1         | Avoid self-interest in order to interest the staff of the school.            | 1     | 2 | 3 | 4 | 5 |
| 2         | Act in ways that promote others, respect for him.                            | 1     | 2 | 3 | 4 | 5 |
| 3         | Showing a sense of strength and confidence.                                  | 1     | 2 | 3 | 4 | 5 |
| 4         | Determines the importance of having a strong sense of purpose of the school. | 1     | 2 | 3 | 4 | 5 |
| 5         | Emphasizes the importance of a collective sense of the school mission.       | 1     | 2 | 3 | 4 | 5 |
| 6         | Considers the moral and ethical consequences of decisions                    | 1     | 2 | 3 | 4 | 5 |
| 7         | Raises awareness of important issues.                                        | 1     | 2 | 3 | 4 | 5 |

### Inspirational Motivation

| Statement |                                                                                                    | Scale |   |   |   |   |
|-----------|----------------------------------------------------------------------------------------------------|-------|---|---|---|---|
|           |                                                                                                    | 1     | 2 | 3 | 4 | 5 |
| 1         | Builds clear future vision                                                                         | 1     | 2 | 3 | 4 | 5 |
| 2         | Expressing confidence about the objectives to be achieved.                                         | 1     | 2 | 3 | 4 | 5 |
| 3         | Thinking of strategies regarding school educational practices                                      | 1     | 2 | 3 | 4 | 5 |
| 4         | The school vision has been formulated in terms that are understandable to others                   | 1     | 2 | 3 | 4 | 5 |
| 5         | Agreeing on the meaning of the school's mission statement among the teaching staff and headmaster. | 1     | 2 | 3 | 4 | 5 |
| 6         | Stimulates teachers to try out new teaching methods                                                | 1     | 2 | 3 | 4 | 5 |
| 7         | Encourage cooperation and collaboration among staff toward common objectives.                      | 1     | 2 | 3 | 4 | 5 |

### Intellectual Stimulation

| Statement |                                                                   | Scale |   |   |   |   |
|-----------|-------------------------------------------------------------------|-------|---|---|---|---|
|           |                                                                   | 1     | 2 | 3 | 4 | 5 |
| 1         | Propose new ways to look at how to accomplish tasks               | 1     | 2 | 3 | 4 | 5 |
| 2         | Seeking to get different viewpoints when solving problems.        | 1     | 2 | 3 | 4 | 5 |
| 3         | Facilitating opportunities for staff to learn from each other.    | 1     | 2 | 3 | 4 | 5 |
| 4         | Creates opportunities for teachers to develop them professionally | 1     | 2 | 3 | 4 | 5 |
| 5         | Motivate teachers to try new teaching methods                     | 1     | 2 | 3 | 4 | 5 |

### Individualized Consideration

| Statement |                                                                       | Scale |   |   |   |   |
|-----------|-----------------------------------------------------------------------|-------|---|---|---|---|
|           |                                                                       | 1     | 2 | 3 | 4 | 5 |
| 1         | Spends time in education and training.                                | 1     | 2 | 3 | 4 | 5 |
| 2         | Treats me as an individual rather than just as a member of the group. | 1     | 2 | 3 | 4 | 5 |

|   |                                                                                            |   |   |   |   |   |
|---|--------------------------------------------------------------------------------------------|---|---|---|---|---|
| 3 | Considers me as an individual has different needs, abilities, and aspirations from others. | 1 | 2 | 3 | 4 | 5 |
| 4 | Helps me to develop my strengths.                                                          | 1 | 2 | 3 | 4 | 5 |
| 5 | considerate of others' needs                                                               | 1 | 2 | 3 | 4 | 5 |

## Section Two: *School Culture*

Strongly disagree = 1 | Disagree = 2 | Neutral = 3 | Agree = 4 | Strongly agree = 5

### Group Work

| Statement |                                                                                          | Scale |   |   |   |   |
|-----------|------------------------------------------------------------------------------------------|-------|---|---|---|---|
|           |                                                                                          | 1     | 2 | 3 | 4 | 5 |
| 1         | The school enhances the stimulus, climate to work.                                       | 1     | 2 | 3 | 4 | 5 |
| 2         | School workers, make more effort, desire to succeed.                                     | 1     | 2 | 3 | 4 | 5 |
| 3         | The school Management is proud of the achievements of teachers in front of the official. | 1     | 2 | 3 | 4 | 5 |
| 4         | School management encourages collaborative work.                                         | 1     | 2 | 3 | 4 | 5 |
| 5         | School workers collaborate on work performance.                                          | 1     | 2 | 3 | 4 | 5 |
| 6         | Workers in school involved in the decision-making.                                       | 1     | 2 | 3 | 4 | 5 |
| 7         | Student's opinions are taken on matters that concern them.                               | 1     | 2 | 3 | 4 | 5 |

### Social Justice

| Statement |                                                                                             | Scale |   |   |   |   |
|-----------|---------------------------------------------------------------------------------------------|-------|---|---|---|---|
|           |                                                                                             | 1     | 2 | 3 | 4 | 5 |
| 1         | School personnel familiar with the school systems and regulations.                          | 1     | 2 | 3 | 4 | 5 |
| 2         | Regulations and rules apply to all employees of the school.                                 | 1     | 2 | 3 | 4 | 5 |
| 3         | Discipline in the performance of work is what distinguishes the school climate.             | 1     | 2 | 3 | 4 | 5 |
| 4         | Evaluate functionality according to achievements.                                           | 1     | 2 | 3 | 4 | 5 |
| 5         | School workers know their rights and duties.                                                | 1     | 2 | 3 | 4 | 5 |
| 6         | School management characterized transparency and clarity.                                   | 1     | 2 | 3 | 4 | 5 |
| 7         | Management of the school applies a method of reward and punishment for the conduct of work. | 1     | 2 | 3 | 4 | 5 |

### Human Relationships

| Statement |                                                                   | Scale |   |   |   |   |
|-----------|-------------------------------------------------------------------|-------|---|---|---|---|
|           |                                                                   | 1     | 2 | 3 | 4 | 5 |
| 1         | Consecration respect among students and school staff.             | 1     | 2 | 3 | 4 | 5 |
| 2         | Be tolerated with inadvertent errors.                             | 1     | 2 | 3 | 4 | 5 |
| 3         | The school has mutual trust between management and staff.         | 1     | 2 | 3 | 4 | 5 |
| 4         | Management sometimes exceeds the systems for the benefit of work. | 1     | 2 | 3 | 4 | 5 |

| 6                             | Encourage school personnel on a good performance.                      |       |   |   |   |   |
|-------------------------------|------------------------------------------------------------------------|-------|---|---|---|---|
| 7                             | Respect the views of employees even if they differed among themselves. | 1     | 2 | 3 | 4 | 5 |
| <b>Innovation and Renewal</b> |                                                                        |       |   |   |   |   |
| Statement                     |                                                                        | Scale |   |   |   |   |
|                               |                                                                        | 1     | 2 | 3 | 4 | 5 |
| 1                             | Encourage ideas and unconventional views on methods of work            | 1     | 2 | 3 | 4 | 5 |
| 2                             | Be honoured workers with outstanding performance                       | 1     | 2 | 3 | 4 | 5 |
| 3                             | Honouring student's holders of developmental views                     | 1     | 2 | 3 | 4 | 5 |
| 4                             | Teachers can exchange ideas and opinions in development.               | 1     | 2 | 3 | 4 | 5 |
| 6                             | Encourage initiative and pioneering ideas.                             | 1     | 2 | 3 | 4 | 5 |
| 7                             | Errors in work are a source of performance development.                | 1     | 2 | 3 | 4 | 5 |

### Section Three: *Teaching Performance*

Strongly disagree = 1 | Disagree = 2 | Neutral = 3 | Agree = 4 | Strongly agree = 5

| <b>Efficiency</b>    |                                                                                                                            |       |   |   |   |   |
|----------------------|----------------------------------------------------------------------------------------------------------------------------|-------|---|---|---|---|
| Statement            |                                                                                                                            | Scale |   |   |   |   |
|                      |                                                                                                                            | 1     | 2 | 3 | 4 | 5 |
| 1                    | Schools' staff have high scientific knowledge.                                                                             | 1     | 2 | 3 | 4 | 5 |
| 2                    | The headmaster has administrative experience distinct                                                                      | 1     | 2 | 3 | 4 | 5 |
| 3                    | School management characterized by efficient the performance of tasks assigned to them.                                    | 1     | 2 | 3 | 4 | 5 |
| 4                    | Teachers possess the moral values that are consistent with the objectives of the school                                    | 1     | 2 | 3 | 4 | 5 |
| 5                    | The principal of the school provides efficient teaching staff.                                                             | 1     | 2 | 3 | 4 | 5 |
| 6                    | The school's management is working on raising the efficiency of the students.                                              | 1     | 2 | 3 | 4 | 5 |
| 7                    | School's Manager works to provide for the needs of students.                                                               | 1     | 2 | 3 | 4 | 5 |
| 8                    | School's teachers are working to develop their knowledge in the area of their speciality.                                  | 1     | 2 | 3 | 4 | 5 |
| <b>Effectiveness</b> |                                                                                                                            |       |   |   |   |   |
| Statement            |                                                                                                                            | Scale |   |   |   |   |
|                      |                                                                                                                            | 1     | 2 | 3 | 4 | 5 |
| 1                    | The school administration is pursuing its teaching through feedback that contributes to improving the educational process. | 1     | 2 | 3 | 4 | 5 |
| 2                    | School management, focusing on productivity in achieving the goals of education.                                           | 1     | 2 | 3 | 4 | 5 |
| 3                    | The headmaster discusses with teachers, student's problems seriously.                                                      | 1     | 2 | 3 | 4 | 5 |

|    |                                                                                                             |   |   |   |   |   |
|----|-------------------------------------------------------------------------------------------------------------|---|---|---|---|---|
| 4  | School administration guide teachers to use more effective ways to deliver educational material to students | 1 | 2 | 3 | 4 | 5 |
| 5  | School management doing achieves effective between teacher and student by applying quality education.       | 1 | 2 | 3 | 4 | 5 |
| 6  | School guide students to choose specialities in the future to accommodate the needs of the market.          | 1 | 2 | 3 | 4 | 5 |
| 7  | School administration guide teacher to follow suitable teaching approach.                                   | 1 | 2 | 3 | 4 | 5 |
| 8  | Teachers can plan and social responsibility.                                                                | 1 | 2 | 3 | 4 | 5 |
| 9  | School guide students to choose specialities                                                                | 1 | 2 | 3 | 4 | 5 |
| 10 | Administration of school allows students an opportunity to deliver their ideas to it.                       | 1 | 2 | 3 | 4 | 5 |
